# Supplementary material for: Analysis of rod/cone gap junctions from the reconstruction of mouse photoreceptor terminals
Source: eLife. 2022 Apr 26;11:e73039. doi: 10.7554/eLife.73039 (PMC9170248; doi:10.7554/eLife.73039)
Supplement: Figure 2—source data 1. — Source data for Figure 2F. [file elife-73039-fig2-data1.xlsx]

## Sheet: Sheet1
Figure 2 - data 1
Souce data for Fig. 2F
Dataset name	N of coloc GJ
M2018 15A single GFP cone Airy	31
M2018 16A CAR GFP Cx36 vGlut1 Airy	52
M2018 16B CAR GFP Cx36 vGlut1 Airy	53
M2018 15B A single GFP cone Airy	52
M2018 15B B single GFP cone Airy	60
M2018 15B D two GFP cone Airy low rod	54
|M2018 15B D two GFP cone Airy low rod	46
M2018 15B E single GFP cone Airy	40
M2018 15B F single GFP cone Airy	63
M2018 15B G single GFP cone Airy	53
M2018 15B I single GFP cone Airy	51
M2018 15B K single GFP cone Airy	38
M2018 17 A wholemount CAR GFP Cx36 vGlut1 Airy	49
M2018 17 B wholemount 2 cones CAR GFP Cx36 vGlut1 Airy	52
|M2018 17 B wholemount 2 cones CAR GFP Cx36 vGlut1 Airy	49
M2018 17 C wholemount single cone CAR GFP Cx36 vGlut1 Airy	58
M2018 17 D wholemount single cone CAR GFP Cx36 vGlut1 Airy	71
M2018 17 E wholemount single cone CAR GFP Cx36 vGlut1 Airy	53
