# Supplementary material for: Analysis of rod/cone gap junctions from the reconstruction of mouse photoreceptor terminals
Source: eLife. 2022 Apr 26;11:e73039. doi: 10.7554/eLife.73039 (PMC9170248; doi:10.7554/eLife.73039)
Supplement: Figure 3—source data 1. — Source data for Figure 3F and G. [file elife-73039-fig3-data1.xlsx]

## Sheet: Sheet1
Figure 3 - data 1
Souce data for Fig. 3F,G
Sample #	Rod #	N of GJ
M2017 2G	1	1
	2	3
	3	2
	4	3
	5	3
	6	2
	7	3
	8	2
	9	3
	10	3
	11	2
	12	3
	13	4
	14	2
	15	4
	16	4
	17	3
	18	2
	19	3
	20	2
	21	6
	22	3
	23	2
	24	3
	25	4
	26	5
	27	3
	28	3
	29	2
	30	2
	31	3
	32	3
	33	5
	34	3
	35	2
	36	4
	37	1
M2017 2H	1	2
	2	2
	3	2
	4	1
	5	2
	6	2
	7	2
	8	2
	9	3
	10	4
	11	2
	12	3
	13	2
	14	3
	15	2
	16	2
	17	3
M2017 2I	1	2
	2	3
	3	4
	4	2
	5	2
	6	2
	7	2
	8	1
	9	1
	10	2
	11	2
	12	2
	13	3
	14	2
	15	3
	16	3
	17	3
	18	1
	19	3
	20	2
M2017 2D	1	1
	2	2
	3	1
	4	2
	5	4
	6	1
	7	2
	8	1
	9	1
	10	2
	11	2
	12	2
M2017 2B	1	3
	2	3
	3	1
	4	2
	5	1
	6	1
	7	3
	8	2
	9	1
	10	2
	11	3
	12	4
	13	4
	14	2
	15	2
	16	2
	17	1
	18	2
	19	2
	20	2
	21	2
	22	1
	23	2
	24	2
	25	2
	26	1
	27	3
	28	3
	29	1
	30	3
M2018 15A	1	1
	2	3
	3	1
	4	3
	5	1
	6	3
	7	2
	8	3
	9	3
	10	4
	11	3
	12	3
	13	5
	14	4
	15	2
	16	6
	17	3
	18	3
	19	3
	20	2
	21	2
	22	3
	23	2
	24	2
	25	4
	26	3
	27	3
	28	1
	29	2
	30	2
	31	4
	32	3
	33	3
	34	2
	35	3
	36	4
	37	1
	38	1
	39	3
	40	3
	41	3
	42	3
	43	1
	44	2
	45	2
	46	3
	47	3
	48	3
	49	2
	50	3
	51	3
	52	2
	53	2
	54	3
	55	4
	56	2
	57	3
	58	3
	59	3
	60	5
	61	2
	62	4
	63	3
	64	3
M2018 16A	1	2
	2	2
	3	1
	4	3
	5	1
	6	3
	7	3
	8	3
	9	1
	10	3
	11	4
	12	2
	13	2
	14	1
	15	4
	16	3
	17	2
	18	3
	19	1
	20	3
	21	2
	22	2
	23	1
	24	3
	25	2
	26	4
	27	1
	28	2
	29	1
	30	2
	31	1
	32	2
	33	3
	34	1
	35	3
	36	2
	37	2
	38	3
	39	3
	40	2
	41	1
	42	3
	43	1
	44	5
	45	2
	46	5
	47	2
	48	1
	49	4
	50	1
	51	3
	52	3
	53	3
	54	4
	55	3
	56	1
	57	2
	58	2
	59	2
	60	2
	61	3
	62	3
	63	4
	64	3
	65	2
	66	2
	67	2
	68	5
	69	2
	70	3
	71	2
	72	2
	73	1
	74	2
	75	3
	76	3
	77	1
	78	4
	79	3
	80	4
