# Supplementary material for: Analysis of rod/cone gap junctions from the reconstruction of mouse photoreceptor terminals
Source: eLife. 2022 Apr 26;11:e73039. doi: 10.7554/eLife.73039 (PMC9170248; doi:10.7554/eLife.73039)
Supplement: Figure 5—source data 1. — Source data for Figure 5F–H. [file elife-73039-fig5-data1.xlsx]

## Sheet: Sheet1
Figure 5 - data 1
Souce data for Fig. 5F-H
*Cone 2, 14, BC3-5 are blue cones
Cone #	Coverage area (um^2)	Convergence
Cone 1	99.8697	44
Cone 2	98.0041	41
Cone 3	79.9708	38
Cone 4	93.0482	40
Cone 5	90.8774	34
Cone 6	95.7444	45
Cone 7	110.826	43
Cone 8	82.9188	37
Cone 9	127.167	48
Cone 10	117.43	45
Cone 11	109.318	36
Cone 12	116.131	46
Cone 13	86.7416	42
Cone 14	83.372	48
Cone 15	124.874	52
Cone 16	80.6259	39
Cone 17	123.984	52
Cone 18	115.071	43
Cone 19	101.487	46
Cone 20	108.971	42
Cone 21	105.045	45
Cone 22	142.71	48
Cone 23	65.3695	33
Cone 24	148.351	55
Cone 25	121.197	46
Cone 26	98.7733	39
Cone 27	82.3042	34
Cone 28	119.172	45
Cone 29	74.764	42
BC 3	107.667	39
BC 4	59.9634	39
BC 5	76.4191	32
Cone30	81.7162	37
Cone31	68.8048	27
Cone32	133.595	61
Cone33	129.594	48
