# Supplementary material for: Analysis of rod/cone gap junctions from the reconstruction of mouse photoreceptor terminals
Source: eLife. 2022 Apr 26;11:e73039. doi: 10.7554/eLife.73039 (PMC9170248; doi:10.7554/eLife.73039)
Supplement: Figure 5—source data 2. — Source data for Figure 5—figure supplement 2B. [file elife-73039-fig5-data2.xlsx]

## Sheet: Sheet1
Figure 5 - data 2
Souce data for Fig. 5 supplement 2B
*Cone 2, 14, BC 3-5 are blue cones
		BC-GC	GC-GC
Pairs		Shared Rods N	Shared Rods N	29 cones	13 cones
Cone1	Cone2	4		4	4
Cone1	Cone4		1	1	1
Cone1	Cone3		3	3	3
Cone1	Cone11		7	7	7
Cone1	Cone17		4	4	4
Cone1	Cone19		6	6	6
Cone1	Cone20		1	1	1
Cone1	Cone21		9	9	9
Cone2	Cone3	15		15	15
Cone2	Cone4	13		13	13
Cone2	Cone5	3		3	3
Cone2	Cone11	2		2	2
Cone2	Cone15	1		1	1
Cone2	Cone16	2		2	2
Cone2	Cone17	1		1	1
Cone3	Cone4		1	1	1
Cone3	Cone5		6	6	6
Cone3	Cone9		9	9	9
Cone3	Cone11		7	7	7
Cone3	Cone12		1	1	1
Cone4	Cone5		4	4	4
Cone4	Cone6		12	12	12
Cone4	Cone15		8	8	8
Cone4	Cone16		1	1	1
Cone5	Cone6		6	6	6
Cone5	Cone7		4	4	4
Cone5	Cone8		14	14	14
Cone5	Cone9		4	4	4
Cone6	Cone7		12	12	12
Cone6	Cone13		2	2	2
Cone6	Cone14	1		1	1
Cone6	Cone15		4	4	4
Cone6	Cone29		3	3	3
Cone7	Cone8		8	8	8
Cone7	Cone13		2	2	2
Cone7	Cone27		2	2	2
Cone7	Cone28		13	13	13
Cone7	Cone29		6	6	6
Cone8	Cone9		7	7	7
Cone8	Cone10		6	6	6
Cone8	Cone27		3	3	3
Cone8	Cone28		2	2	2
Cone9	Cone10		15	15	15
Cone9	Cone11		1	1	1
Cone9	Cone12		8	8	8
Cone9	Cone24		5	5	5
Cone9	Cone25		12	12	12
Cone10	Cone25		5	5	5
Cone10	Cone26		16	16	16
Cone10	Cone27		1	1	1
Cone11	Cone12		12	12	12
Cone11	Cone21		8	8	8
Cone11	Cone22		4	4	4
Cone12	Cone21		1	1	1
Cone12	Cone22		4	4	4
Cone12	Cone23		9	9	9
Cone12	Cone24		13	13	13
Cone12	Cone25		1	1	1
Cone13	Cone14	9		9
Cone13	Cone29		1	1
Cone14	Cone15	23		23
Cone14	Cone16	2		2
Cone15	Cone17		9	9
Cone16	Cone17		5	5
Cone17	Cone18		14	14
Cone18	Cone19		2	2
Cone19	Cone20		7	7
Cone19	Cone21		2	2	2
Cone19	Cone22		1	1
Cone20	Cone21		7	7	7
Cone20	Cone22		11	11
Cone21	Cone22		13	13	13
Cone22	Cone23		5	5
Cone23	Cone24		5	5
Cone24	Cone25		12	12
Cone25	Cone26		8	8
Cone26	Cone27		5	5
Cone27	Cone28		7	7
Cone28	Cone29		9	9
BC3	Cone30	10
BC3	Cone33	2
BC4	Cone31	4
BC4	Cone32	13
Cone30	Cone33		11
Cone32	Cone33		5
