# Supplementary material for: Analysis of rod/cone gap junctions from the reconstruction of mouse photoreceptor terminals
Source: eLife. 2022 Apr 26;11:e73039. doi: 10.7554/eLife.73039 (PMC9170248; doi:10.7554/eLife.73039)
Supplement: Figure 8—source data 1. — Source data for Figure 8A–G. [file elife-73039-fig8-data1.xlsx]

## Sheet: Sheet1
Figure 8 - data 1
Souce data for Fig. 8A-G
		7A		7B,C	7D	7D	7E,G	7F
Dataset #	Rod #	N of GJ	GJ #	Distance	GJ width	GJ length	total GJ length / rod	average GJ length / rod
EM1	1800_1600_500	1	1	352.6	178.6	1478	1478	1478
	3300_1400_500	2	1	481.4	103	495	972	486
			2	1066	119	477
	3900_3400_500	3	1	379.6	179.7	510.8	1286.7	428.9
			2	322.9	111.638	590.9
			3	2376	113	185
	5000_2000_500	3	1	560.5	60	152	1326.8	442.267
			2	344.8	128.4	947.8
			3	711.3	107.5	227
	Low_2200_600_500	3	1	401.9	111	286	1562.7	520.9
			2	219.4	76.84	587.9
			3	474.7	149.6	688.8
	Low_3000_1000_500	3	1	608.1	84	261	618	206
			2	346.1	130.5	226
			3	720.5	54	131
	1200_1900_500	4	1	471	78.5	253	1852.5	463.126
			2	321.6	102.6	740.5
			3	495.1	127.5	455.4
			4	809.4	160.94	403.603
	2400_1500_500	3	1	525.5	166.713	418.8	1392.54	464.179
			2	464.4	104.3	600.2
			3	554.4	121.237	373.536
	2500_2600_500	4	1	292.2	106.1	778.3	1734.24	433.561
			2	334.6	115.682	313.726
			3	726.4	145.222	373.914
			4	2456	106.532	268.304
	2500_3300_500	5	1	307.7	140	954.9	1982.18	396.436
			2	644.6	120.717	191.826
			3	523.7	122.135	377.435
			4	1636	116.332	308.107
			5	3244	86.624	149.913
	3100_2600_500	4	1	237.7	114.6	550.8	2199.89	549.971
			2	317.4	75.07	441.1
			3	699.6	145.543	460.992
			4	1934	107.756	746.994
	3500_2200_500	2	1	317.5	113	660.3	1523.8	761.9
			2	304.4	98.79	863.5
	4100_2600_500	3	1	411.2	118.8	645.5	1884.8	628.267
			2	535.4	108.711	535.302
			3	546.9	107.3	704
	4500_2000_500	6	1	575	125.776	414.383	2046.8	341.133
			2	341	141.7	352.1
			3	366.8	117.975	435.136
			4	494.7	82.571	173.155
			5	3047	117.2	290.3
			6	3424	109.271	381.725
	5000_3000_500	3	1	1178	125	755.2	1580.39	526.796
			2	1287	138.1	521.5
			3	1372	130.465	303.687
	5400_2600_500	3	1	346.5	123.751	471.619	1338.03	446.011
			2	737.8	123.8	461.7
			3	366	112.154	404.715
	5600_1500_500	3	1	538.2	103.9	756.9	1862.09	620.697
			2	332.5	123.2	560.9
			3	382.9	136.223	544.29
	5600_2100_500	4	1	580.4	93.523	329.314	1530.71	382.678
			2	377.2	100.9	365.3
			3	997.2	100.45	210.197
			4	1753	121.8	625.9
EM2	900_1500_500	3	1	273.3	154.2	540.7	1349.86	449.954
			2	483.5	227.391	339.963
			3	299.2	100.2	469.2
	500_2200_500	3	1	445.5	121.5	895.7	1952.84	650.947
			2	738.9	142.657	321.741
			3	254.6	131.1	735.4
	1400_1900_500	2	1	391	175.392	384.035	912.361	456.181
			2	288.1	145.034	528.326
	2400_1800_500	2	1	368.5	144.888	418.37	1522.37	761.185
			2	335.5	108.2	1104
	2400_2900_500	6	1	396.3	127.668	405.668	1874.44	312.407
			2	447.5	184.091	342.346
			3	483.4	138.256	313.391
			4	492.4	150.827	199.75
			5	418.3	110.857	249.089
			6	1062	102.8	364.2
	2900_2800_500	4	1	375.7	173.13	486.992	1903.33	475.833
			2	412.6	139.4	617.2
			3	363.6	143.7	575.4
			4	806	137.079	223.739
	3600_1800_500	2	1	356.9	142.979	406.871	1217.67	608.835
			2	397.2	127.7	810.8
	5000_1600_500	3	1	284.5	121.4	561	1487.74	495.913
			2	379.1	118	452.9
			3	422.6	142.694	473.839
	900_2000_1000	5	1	519.9	269.229	404.323	1851.66	370.331
			2	327.8	129.439	365.197
			3	483.4	137.329	388.775
			4	698	91.535	409.754
			5	1331	85.4045	283.608
	1400_1300_1000	3	1	251.5	265.278	439.16	1635.46	545.154
			2	338.7	125.788	429.202
			3	396.6	135.3	767.1
	1500_2500_1000	5	1	880.3	107.514	285.483	1787.55	357.509
			2	379.7	140.775	412.348
			3	423.1	143.067	381.915
			4	516.1	173.359	384.935
			5	2863	121.116	322.865
	2200_1700_1000	4	1	326.4	112.522	480.763	1549.94	387.485
			2	379.4	151.006	517.13
			3	403.2	128.28	239.365
			4	758.2	105.809	312.68
	3000_2000_1000	2	1	285	157.356	634.491	1471.29	735.645
			2	266.2	119.7	836.8
	2700_2800_1000	4	1	412.1	175.34	493.927	1778.82	444.704
			2	652.1	118.305	225.734
			3	1464	154.3	673.8
			4	390	116.378	385.356
	3700_1500_1000	3	1	418.1	165.446	334.894	927.107	309.036
			2	260.8	99.147	411.271
			3	376.5	96.918	180.942
	4000_2200_1000	2	1	406.7	128.6	832	1133.98	566.99
			2	349.7	101.836	301.979
	4300_1700_1000	6	1	2560	117.764	368.937	3072.42	512.07
			2	1771	78.711	248.71
			3	1263	97.318	517.474
			4	2350	96.712	511.2
			5	317.2	124.9	899.4
			6	1287	130.4	526.7
	4800_1300_1000	4	1	616.3	100.143	344.852	1922.14	480.534
			2	293.2	131.215	577.658
			3	325.2	95.055	388.608
			4	1539	121.552	611.018
	4900_2100_1000	2	1	307.3	146.2	812	1033.79	516.893
			2	322.5	85.4335	221.786
	5300_2400_1000	3	1	484.4	92.144	390.123	1159.22	386.408
			2	463.7	113.5	358.2
			3	434.7	96.357	410.9
	Low 700_1300_1000	2	1	324.9	95.391	822.145	1359.08	679.542
			2	280.8	118.274	536.939
	Low 2200_700_1000	3	1	767.5	99.257	450.721	1340.66	446.888
			2	271.8	124.323	356.835
			3	380.7	74.914	533.107
	Low 3100_1000_1000	2	1	707.1	93.582	454.093	646.322	323.161
			2	486.3	77.026	192.229
	Low 4100_800_1000	1	1	501.6	106.064	1379.77	1379.77	1379.77
